# Supplementary material for: Bottom-up design of high-energy-density molecules (N2CO)n (n = 2–8)
Source: Royal Society of Chemistry journal article supplement (doi:10.1039/c6ra28358f), 2017-01-01
Supplement: c6ra28358f1.pdf [file c6ra28358f1.pdf]

## Supporting Information

### Bottom-up design of high-energy-density molecules ( $\text{N}_2\text{CO}$ )<sub>n</sub> (n=2-8)

Jing-fan Xin,<sup>ab</sup> Fei-fei He<sup>a</sup> and Yi-hong Ding<sup>\*a</sup>

<sup>a</sup> Laboratory of Theoretical and Computational Chemistry, Institute of Theoretical Chemistry, Jilin University, Changchun 130023, P. R. China.

E-mail: yhdd@jlu.edu.cn

<sup>b</sup> Inner Mongolia Key Laboratory of Photoelectric Functional Materials, College of Chemistry and Chemical Engineering, Chifeng University, Chifeng 024000

Table S1 The coordinate of (*cyc*-N<sub>2</sub>CO)<sub>2</sub>

| atom | X           | Y           | Z           |
|------|-------------|-------------|-------------|
| O    | -0.00001100 | -1.03031000 | -0.00028700 |
| O    | 0.00001500  | 1.03036600  | -0.00030000 |
| C    | -0.95443900 | 0.00006100  | -0.00035300 |
| C    | 0.95443300  | 0.00000800  | -0.00029500 |
| N    | -2.20262400 | -0.00003700 | -0.63425100 |
| N    | -2.20198900 | -0.00002800 | 0.63488400  |
| N    | 2.20202000  | -0.00002100 | 0.63486400  |
| N    | 2.20259300  | -0.00003700 | -0.63427000 |

Table S1-1 The critical transition state coordinate of (*cyc*-N<sub>2</sub>CO)<sub>2</sub>

| atom | X           | Y           | Z           |
|------|-------------|-------------|-------------|
| O    | -0.02262500 | 1.02311000  | -0.33760800 |
| O    | -0.02261600 | -1.02303700 | -0.33780300 |
| C    | 0.88359600  | 0.00006100  | -0.54838300 |
| C    | -0.94769000 | 0.00000400  | -0.05964400 |
| N    | 2.39750200  | 0.00001600  | -0.19782400 |
| N    | 2.00372900  | -0.00009200 | 0.91972000  |
| N    | -1.97741100 | -0.00008500 | 0.89570500  |
| N    | -2.31717800 | 0.00002200  | -0.32453600 |

Table S2 The coordinate of (cyc-N<sub>2</sub>CO)<sub>3</sub>

| atom | X           | Y           | Z           |
|------|-------------|-------------|-------------|
| O    | -0.94596200 | 0.55043300  | -0.67948300 |
| O    | 0.94549400  | 0.55099100  | 0.67935400  |
| O    | 0.00046400  | -1.46393200 | -0.00028200 |
| C    | -0.00048100 | 1.30999800  | -0.00005200 |
| C    | 1.15425500  | -0.70213200 | 0.13135400  |
| C    | -1.15385300 | -0.70277700 | -0.13146900 |
| N    | 0.33273900  | 2.57680300  | -0.53287100 |
| N    | -0.33434300 | 2.57655200  | 0.53298400  |
| N    | -2.35793200 | -1.37690400 | -0.42424100 |
| N    | -2.24759300 | -0.95338000 | 0.75071500  |
| N    | 2.24850500  | -0.95193600 | -0.75047000 |
| N    | 2.35869700  | -1.37548800 | 0.42449500  |

Table S2-1 The critical transition state coordinate of (cyc-N<sub>2</sub>CO)<sub>3</sub>

| atom | X           | Y           | Z           |
|------|-------------|-------------|-------------|
| O    | 0.02164300  | -0.84922000 | 0.75252800  |
| O    | 1.13902900  | 0.63700400  | -0.66914900 |
| O    | -1.16658700 | 0.57647200  | -0.67409000 |
| C    | 1.17436100  | -0.57431300 | 0.04456300  |
| C    | -0.03202000 | 1.30155100  | -0.67131400 |
| C    | -1.14287900 | -0.63311200 | 0.04322000  |
| N    | 2.41175600  | -1.00954900 | 0.56329400  |
| N    | 2.00892900  | -1.60496900 | -0.46536400 |
| N    | -2.35752500 | -1.12748300 | 0.56285500  |
| N    | -1.92520000 | -1.70500100 | -0.46407200 |
| N    | -0.05880400 | 2.17645800  | 0.99314100  |
| N    | -0.07193400 | 2.77357300  | -0.01458700 |

Table S3 The coordinate of (cyc-N<sub>2</sub>CO)<sub>4</sub>

| atom | X           | Y           | Z           |
|------|-------------|-------------|-------------|
| O    | -0.51017900 | 1.25937600  | -0.78702900 |
| O    | 1.48884600  | 0.05135800  | -0.88875800 |
| O    | 0.41680200  | -1.89824100 | -0.13795200 |
| O    | -1.03251100 | -0.35729200 | 0.83121700  |
| C    | -0.88253700 | -1.42256200 | -0.04254000 |
| C    | -1.32691200 | 0.87255700  | 0.25873500  |
| C    | 0.85700700  | 1.23406100  | -0.55474000 |
| C    | 1.44252600  | -0.98934600 | 0.02549900  |
| N    | -1.90689900 | -2.40031700 | -0.15423500 |
| N    | -1.77864800 | -1.63463800 | -1.13416100 |
| N    | -1.92850500 | 1.83915800  | 1.11609800  |
| N    | -2.66874600 | 1.35295700  | 0.23639900  |
| N    | 1.45312000  | 2.15018300  | 0.38276600  |
| N    | 1.57505300  | 2.43763500  | -0.82036800 |
| N    | 2.07975500  | -0.86207600 | 1.30763200  |
| N    | 2.68284500  | -1.54145300 | 0.45707600  |

Table S3-1 The critical transition state coordinate of (cyc-N<sub>2</sub>CO)<sub>4</sub>

| atom | X           | Y           | Z           |
|------|-------------|-------------|-------------|
| O    | -0.13777100 | 1.27372300  | -0.82658100 |
| O    | 1.51032900  | -0.40994400 | -0.97643700 |
| O    | -0.16685400 | -1.92944000 | -0.28396600 |
| O    | -1.08304000 | -0.06711300 | 0.83352100  |
| C    | -1.27740900 | -1.09132100 | -0.06093500 |
| C    | -0.97352500 | 1.19696800  | 0.27060500  |
| C    | 1.17555000  | 0.89531300  | -0.61677300 |
| C    | 1.11219200  | -1.54381900 | -0.35687400 |
| N    | -2.52628900 | -1.77052400 | -0.10029900 |
| N    | -2.27655400 | -1.04106200 | -1.08110600 |
| N    | -1.16370800 | 2.30454300  | 1.14460700  |
| N    | -2.07505400 | 2.09894300  | 0.31614000  |
| N    | 2.00650900  | 1.59641800  | 0.32163100  |
| N    | 2.18799900  | 1.86299600  | -0.87943900 |
| N    | 1.60251300  | -1.20792800 | 1.48436500  |
| N    | 2.07284800  | -2.08348000 | 0.88146600  |

Table S4 The coordinate of (cyc-N<sub>2</sub>CO)<sub>5</sub>

| atom | X           | Y           | Z           |
|------|-------------|-------------|-------------|
| O    | -1.02470600 | -1.39294400 | -0.96405500 |
| O    | -1.45195500 | 0.90790200  | -0.78321700 |
| O    | 0.32311100  | 1.17256600  | 0.72910600  |
| O    | 1.11189800  | -2.02063700 | -0.37669000 |
| O    | 1.59695900  | 0.18231300  | -0.95702500 |
| C    | 1.96148600  | -0.94163100 | -0.23218800 |
| C    | 1.31565400  | 1.31906800  | -0.22631200 |
| C    | -0.96101200 | 1.53150800  | 0.34386400  |
| C    | -1.92106600 | -0.39416800 | -0.66568600 |
| C    | -0.19251200 | -1.88579600 | 0.03549500  |
| N    | 3.34393400  | -1.26626400 | -0.10713200 |
| N    | 2.79993600  | -0.83453700 | 0.92818900  |
| N    | -0.68850700 | -2.90318800 | 0.90919800  |
| N    | -0.54027500 | -1.77738200 | 1.42359200  |
| N    | -3.09969300 | -0.66488600 | 0.12552600  |
| N    | -3.26639600 | -0.60817200 | -1.10278200 |
| N    | -1.82865600 | 1.97789600  | 1.38836500  |
| N    | -1.42403800 | 2.86012300  | 0.60884300  |
| N    | 1.54360500  | 2.57004100  | -0.87417100 |
| N    | 2.35184000  | 2.27958700  | 0.02666000  |

Table S4-1 The critical transition state coordinate of (cyc-N<sub>2</sub>CO)<sub>5</sub>

| atom | X           | Y           | Z           |
|------|-------------|-------------|-------------|
| O    | 0.55517300  | -1.63809400 | 0.72119700  |
| O    | -1.20903200 | -0.74000800 | -0.49566600 |
| O    | -1.55195000 | 0.87912200  | 1.10523200  |
| O    | 1.55955400  | -0.04201100 | -0.67921100 |
| O    | 0.62189500  | 1.56228600  | 0.77600600  |
| C    | 1.56860600  | 1.24999100  | -0.17577600 |
| C    | -0.69953500 | 1.71951800  | 0.38356700  |
| C    | -1.97463000 | -0.26519700 | 0.53964200  |
| C    | -0.46248000 | -1.86714500 | -0.18196300 |
| C    | 1.72395400  | -1.08126300 | 0.21680600  |
| N    | 2.08801300  | 2.25573000  | -1.05369200 |
| N    | 2.81268000  | 1.95513300  | -0.08868700 |
| N    | 2.87070600  | -1.92318100 | 0.05896600  |
| N    | 2.87188200  | -1.17537700 | 1.05657200  |
| N    | -1.05978000 | -3.16398600 | -0.20067700 |
| N    | -0.35729800 | -2.87660600 | -1.18758500 |
| N    | -3.59863900 | -0.45618800 | 0.40073400  |
| N    | -3.47437700 | 0.29897600  | -0.47584600 |
| N    | -1.07278900 | 2.24760200  | -0.89153600 |
| N    | -1.18620000 | 3.02278500  | 0.07973600  |

Table S5 The coordinate of (cyc-N<sub>2</sub>CO)<sub>6</sub>

| atom | X           | Y           | Z           |
|------|-------------|-------------|-------------|
| O    | -1.23545700 | -1.06101700 | -0.96946600 |
| O    | -1.66852100 | 1.24315100  | -0.80855600 |
| O    | -0.00816000 | 1.14677400  | 0.84181300  |
| O    | 1.73168700  | -1.32842500 | -0.86517600 |
| O    | 1.41967800  | 0.99143600  | -1.00618200 |
| C    | 2.29698500  | -0.07453400 | -0.88578200 |
| C    | -1.27395000 | 1.57247000  | 0.47109000  |
| C    | -2.15246100 | -0.03698000 | -1.03497900 |
| N    | 3.52424800  | 0.03538400  | -1.61406300 |
| N    | 3.63568500  | 0.13745900  | -0.38253600 |
| N    | -2.21921600 | -2.46680700 | 0.79655700  |
| N    | -1.76649800 | -1.47739900 | 1.41601100  |
| N    | -3.56857400 | -0.28799900 | -0.90404600 |
| N    | -3.14575500 | -0.12144100 | -2.05908900 |
| N    | -2.23166300 | 1.72793900  | 1.52387200  |
| N    | -1.80449100 | 2.78372300  | 1.02472800  |
| N    | 1.26242800  | 3.10295300  | 0.12284100  |
| N    | 2.01714000  | 2.45068000  | 0.86368500  |
| C    | -1.10413400 | -1.81664900 | 0.19449500  |
| O    | 0.07453100  | -2.52088500 | 0.19661400  |
| C    | 1.05194900  | 1.68440200  | 0.12691700  |
| N    | 1.67984200  | -1.30367900 | 1.60007500  |
| N    | 2.18865600  | -2.39513600 | 1.27387000  |
| C    | 1.26283400  | -1.84004400 | 0.33730800  |

Table S5-1 The critical transition state coordinate of (cyc-N<sub>2</sub>CO)<sub>6</sub>

| atom | X           | Y           | Z           |
|------|-------------|-------------|-------------|
| O    | -2.15256400 | 0.04704500  | -0.91049700 |
| O    | -1.32200200 | 2.05673400  | -0.14015800 |
| O    | 0.73933300  | 0.99490500  | 0.15967500  |
| O    | 1.68295500  | -2.03465600 | -0.15150400 |
| O    | 2.49142600  | 0.03974300  | -0.99040300 |
| C    | 2.63070400  | -1.08713600 | -0.27899400 |
| C    | -0.05243600 | 2.09466800  | 0.40738700  |
| C    | -2.09730000 | 0.94766400  | 0.14065100  |
| N    | 3.72801900  | -0.98666600 | 0.95437900  |
| N    | 2.86700900  | -0.47437300 | 1.54564500  |
| N    | -2.64165800 | -2.23735900 | -1.30220600 |
| N    | -2.64605000 | -2.20169800 | -0.06242100 |
| N    | -2.38646200 | 0.55336800  | 1.49116800  |
| N    | -3.29000600 | 1.17200800  | 0.89899500  |
| N    | 0.17091200  | 2.79146100  | 1.63786500  |
| N    | 0.51838200  | 3.39030300  | 0.60407500  |
| N    | 0.69260000  | 0.97125300  | -2.31651800 |
| N    | 1.45592300  | 1.92169500  | -2.01774300 |
| C    | -1.76641500 | -1.26294000 | -0.72106600 |
| O    | -0.41016900 | -1.49745300 | -0.83183300 |
| C    | 1.36601100  | 0.87211300  | -1.06906700 |
| N    | 0.06150100  | -1.50212600 | 1.61493700  |
| N    | -0.09026600 | -2.70638200 | 1.30071700  |
| C    | 0.36757600  | -1.84619400 | 0.26700900  |

Table S6 The coordinate of (cyc-N<sub>2</sub>CO)<sub>7</sub>

| atom | X           | Y           | Z           |
|------|-------------|-------------|-------------|
| O    | -1.15725200 | -1.43274100 | -0.94964400 |
| O    | -1.53941100 | 0.88983300  | -1.01812100 |
| O    | 1.76361900  | -2.15723600 | -0.34914000 |
| O    | 1.46874900  | -0.00786700 | -1.11456400 |
| C    | 2.37112700  | -0.97223500 | -0.67390000 |
| C    | -1.97739100 | -0.39119700 | -1.31774100 |
| N    | 3.65556700  | -1.07886300 | -1.28625800 |
| N    | 3.65028800  | -0.61011800 | -0.12976400 |
| N    | -2.58549900 | -2.60281500 | 0.68045200  |
| N    | -2.19566100 | -1.58376300 | 1.29582900  |
| N    | -3.37775600 | -0.61736100 | -1.59961200 |
| N    | -2.63023200 | -0.52324200 | -2.58432100 |
| N    | -3.05349400 | 1.41720200  | 0.82974000  |
| N    | -2.60883800 | 2.50174500  | 0.41922300  |
| N    | 1.38331800  | 2.30330600  | -1.71406000 |
| N    | 2.59380400  | 2.11866900  | -1.50371600 |
| C    | -1.32719600 | -2.07699000 | 0.27217600  |
| O    | -0.22914800 | -2.84010900 | 0.58473200  |
| C    | 1.68878500  | 1.29784500  | -0.74263600 |
| N    | 1.19593700  | -1.33951000 | 1.91020500  |
| N    | 1.62077800  | -2.50274000 | 2.04545400  |
| C    | 0.98281900  | -2.21948700 | 0.79658100  |
| O    | 1.57500300  | 1.56021700  | 0.61115000  |
| C    | -1.73635100 | 1.37026400  | 0.26346800  |
| O    | -0.67890300 | 1.17828300  | 1.12966200  |
| C    | 0.38195000  | 2.07313500  | 1.07736000  |
| N    | 0.50147000  | 3.02253700  | 2.13727700  |
| N    | 0.14693100  | 3.49337400  | 1.04177400  |

Table S6-1 The critical transition state coordinate of (cyc-N<sub>2</sub>CO)<sub>7</sub>

| atom | X           | Y           | Z           |
|------|-------------|-------------|-------------|
| O    | -2.66367700 | 0.36709300  | -0.22235800 |
| O    | -2.30985000 | -1.90831100 | -0.23593300 |
| O    | 1.13723800  | 2.50884000  | 0.26291700  |
| O    | 2.01571700  | 0.41181600  | 0.54379600  |
| C    | 2.24430900  | 1.72065800  | 0.07906700  |
| C    | -2.60863700 | -0.80347000 | 0.53221700  |
| N    | 3.50944100  | 2.34163500  | 0.19655100  |
| N    | 3.19413000  | 1.96721300  | -0.95873400 |
| N    | -3.14670200 | 2.24036500  | 1.25996800  |
| N    | -3.04141400 | 2.70601200  | 0.11595800  |
| N    | -3.50375400 | -1.02958200 | 1.61344600  |
| N    | -2.31507800 | -0.79567100 | 1.93010500  |
| N    | -1.43965200 | -1.66966000 | -2.48619200 |
| N    | -1.10871100 | -2.80600300 | -2.09630100 |
| N    | 3.63304200  | -1.26416400 | 1.51710700  |
| N    | 4.25681200  | -0.82226000 | 0.63651700  |
| C    | -2.24703400 | 1.53788200  | 0.38331300  |
| O    | -0.90486100 | 1.64063000  | 0.65966300  |
| C    | 2.78420400  | -0.55443000 | -0.00635600 |
| N    | -0.07528800 | 1.64259400  | -1.67719000 |
| N    | -0.51138100 | 2.80053200  | -1.48547900 |
| C    | -0.04159700 | 2.10629700  | -0.32785400 |
| O    | 2.14186600  | -1.62126100 | -0.51503900 |
| C    | -1.21658100 | -1.80980900 | -1.08147900 |
| O    | -0.11233000 | -1.19456200 | -0.53224200 |
| C    | 0.89826600  | -1.96067500 | 0.02161200  |
| N    | 0.70069900  | -3.30011000 | 0.45767400  |
| N    | 0.80351500  | -2.44699500 | 1.36377800  |

Table S7 The coordinate of (cyc-N<sub>2</sub>CO)<sub>8</sub>

| atom | X           | Y           | Z           |
|------|-------------|-------------|-------------|
| O    | 1.58205500  | 0.76178800  | 1.26892400  |
| O    | 2.56268900  | -0.06629600 | -0.66815500 |
| O    | -2.28855600 | 0.70883900  | 0.14750200  |
| O    | -2.50797800 | -1.63498500 | 0.15560100  |
| C    | -3.07759700 | -0.39669800 | 0.39448900  |
| C    | 2.74619300  | 0.52270100  | 0.57247500  |
| N    | -4.50016400 | -0.31334200 | 0.23667000  |
| N    | -4.07935800 | -0.24351000 | 1.40480300  |
| N    | 1.16578600  | 2.92224000  | 2.28247200  |
| N    | 0.05650400  | 2.36949800  | 2.14615500  |
| N    | 3.93995500  | 0.26487200  | 1.32571300  |
| N    | 3.89185400  | 1.36692400  | 0.75220200  |
| N    | 4.01378500  | -2.00439900 | -0.96051600 |
| N    | 3.26356800  | -1.95683300 | -1.95166000 |
| N    | -1.59089100 | -3.29536900 | 1.63468000  |
| N    | -1.70859100 | -2.30032100 | 2.36811200  |
| C    | 1.03585000  | 2.02814500  | 1.16920900  |
| O    | 1.02106000  | 2.57750400  | -0.10052300 |
| C    | -1.46428600 | -2.02263600 | 0.98234300  |
| N    | -1.13128800 | 3.57292100  | -0.69200300 |
| N    | -0.38624800 | 3.63132800  | -1.69283000 |
| O    | -0.22793300 | -1.52200800 | 0.65302500  |
| C    | 2.71841900  | -1.43672900 | -0.73306300 |
| O    | 1.84631000  | -2.19875300 | 0.02209700  |
| C    | 0.51142100  | -2.16518300 | -0.33032300 |
| N    | -0.03986400 | -3.22661400 | -1.11487700 |
| N    | 0.11205700  | -2.13371800 | -1.70249200 |
| C    | -0.15297100 | 2.53263500  | -0.81587000 |
| O    | -0.50490100 | 1.24145600  | -1.20228300 |
| C    | -1.83273100 | 0.90153800  | -1.15400000 |
| N    | -2.74157600 | 1.35838600  | -2.17189200 |
| N    | -2.37520600 | 0.17036300  | -2.25325900 |

Table S7-1 The critical transition state coordinate of (cyc-N<sub>2</sub>CO)<sub>8</sub>

| atom | X           | Y           | Z           |
|------|-------------|-------------|-------------|
| O    | 1.13048900  | 1.48740500  | 0.50621900  |
| O    | 2.83639300  | 0.28894400  | -0.48713800 |
| O    | -2.96408600 | -0.02060300 | 0.54661800  |
| O    | -1.93504200 | -2.08228100 | 0.06691200  |
| C    | -2.99200600 | -1.40055100 | 0.63600700  |
| C    | 2.37732400  | 0.90782900  | 0.66650400  |
| N    | -4.24596900 | -2.09085500 | 0.66674200  |
| N    | -3.68356000 | -1.94415900 | 1.76658500  |
| N    | 1.88103000  | 3.85693200  | -0.11821500 |
| N    | 1.02646400  | 4.04131200  | 0.66034300  |
| N    | 2.70956000  | 0.43754700  | 1.96816900  |
| N    | 3.30324200  | 1.47255700  | 1.60270200  |
| N    | 4.66596500  | -1.26468700 | -0.04007700 |
| N    | 4.38171100  | -1.36267800 | -1.24758200 |
| N    | -0.18586600 | -2.68178300 | 1.65421900  |
| N    | -0.50473700 | -1.52026900 | 1.97608600  |
| C    | 1.06822500  | 2.48635700  | -0.41328600 |
| O    | -0.06327100 | 2.57075700  | -1.11942400 |
| C    | -0.67290200 | -1.85045800 | 0.59381500  |
| N    | -1.58527300 | 2.62991500  | 0.81142200  |
| N    | -2.16245600 | 3.25283000  | -0.11381900 |
| O    | 0.18241400  | -1.32063000 | -0.35255000 |
| C    | 3.29970000  | -1.00805100 | -0.38147300 |
| O    | 2.38398700  | -1.96917000 | 0.01032500  |
| C    | 1.24317700  | -2.09747600 | -0.76634400 |
| N    | 1.02134900  | -3.35243300 | -1.42235600 |
| N    | 1.34321300  | -2.40697500 | -2.16188900 |
| C    | -1.27608000 | 2.22050100  | -0.51710100 |
| O    | -1.70661600 | 1.03467400  | -1.09692700 |
| C    | -2.92819000 | 0.53111800  | -0.72715800 |
| N    | -4.14156400 | 1.09739500  | -1.25402500 |
| N    | -3.77019800 | 0.02843600  | -1.76803000 |



Table S8 Relative energies of the singlet and triplet state for isomers **1-4** at the B3LYP/6-311G(2d,d,p)(CBS-QB3) levels.

|                                                                    | Isomer 1                      | Isomer 2                      | Isomer 3                     | Isomer 4                      |
|--------------------------------------------------------------------|-------------------------------|-------------------------------|------------------------------|-------------------------------|
| Total energies of singlet state<br>(a.u.)                          | -445.5473301<br>(-444.891981) | -445.4579601<br>(-444.802859) | -445.6367501<br>(-444.97355) | -445.5945446<br>(-444.887639) |
| The rate controlling step of<br>barriers (kcal mol <sup>-1</sup> ) | 31.4 (29.9)                   | 21.1 (19.8)                   | 17.9 (22.2)                  | 2.8 (-1.7)                    |
| Total energies of triplet state<br>(a.u.)                          | -445.45661<br>(-444.800049)   | -445.37207<br>(-444.705405)   | -445.55239<br>(-444.876969)  | -445.5472<br>(-444.879659)    |
| The rate controlling step of<br>barriers (kcal mol <sup>-1</sup> ) | 4.16 (9.31)                   | 6.80 (10.20)                  | 3.01 (0.08)                  | 0.17 (-1.15)                  |

Table S9 Calculated heats of formation and related parameters

| Species                                       | A (Å <sup>2</sup> ) | $\nu$ | $\sigma_{\text{total}}^2$ (kcal mol <sup>-1</sup> ) <sup>2</sup> |
|-----------------------------------------------|---------------------|-------|------------------------------------------------------------------|
| <i>cyc</i> -N <sub>2</sub> CO                 | 77.89               | 0.23  | 140.8                                                            |
| ( <i>cyc</i> -N <sub>2</sub> CO) <sub>2</sub> | 122.00              | 0.17  | 53.5                                                             |
| ( <i>cyc</i> -N <sub>2</sub> CO) <sub>3</sub> | 163.06              | 0.19  | 48.9                                                             |
| ( <i>cyc</i> -N <sub>2</sub> CO) <sub>4</sub> | 198.19              | 0.18  | 42.7                                                             |
| ( <i>cyc</i> -N <sub>2</sub> CO) <sub>5</sub> | 233.02              | 0.16  | 42.7                                                             |
| ( <i>cyc</i> -N <sub>2</sub> CO) <sub>6</sub> | 265.47              | 0.16  | 44.9                                                             |
| ( <i>cyc</i> -N <sub>2</sub> CO) <sub>7</sub> | 297.90              | 0.15  | 44.1                                                             |
| ( <i>cyc</i> -N <sub>2</sub> CO) <sub>8</sub> | 345.99              | 0.16  | 43.6                                                             |
